# Supplementary material for: Association of obesity and long-term mortality in patients with acute myocardial infarction with and without diabetes mellitus: results from the MONICA/KORA myocardial infarction registry
Source: PubMed Central journal article supplement (PMC4396021; doi:10.1186/s12933-015-0189-0), 2015-02-18

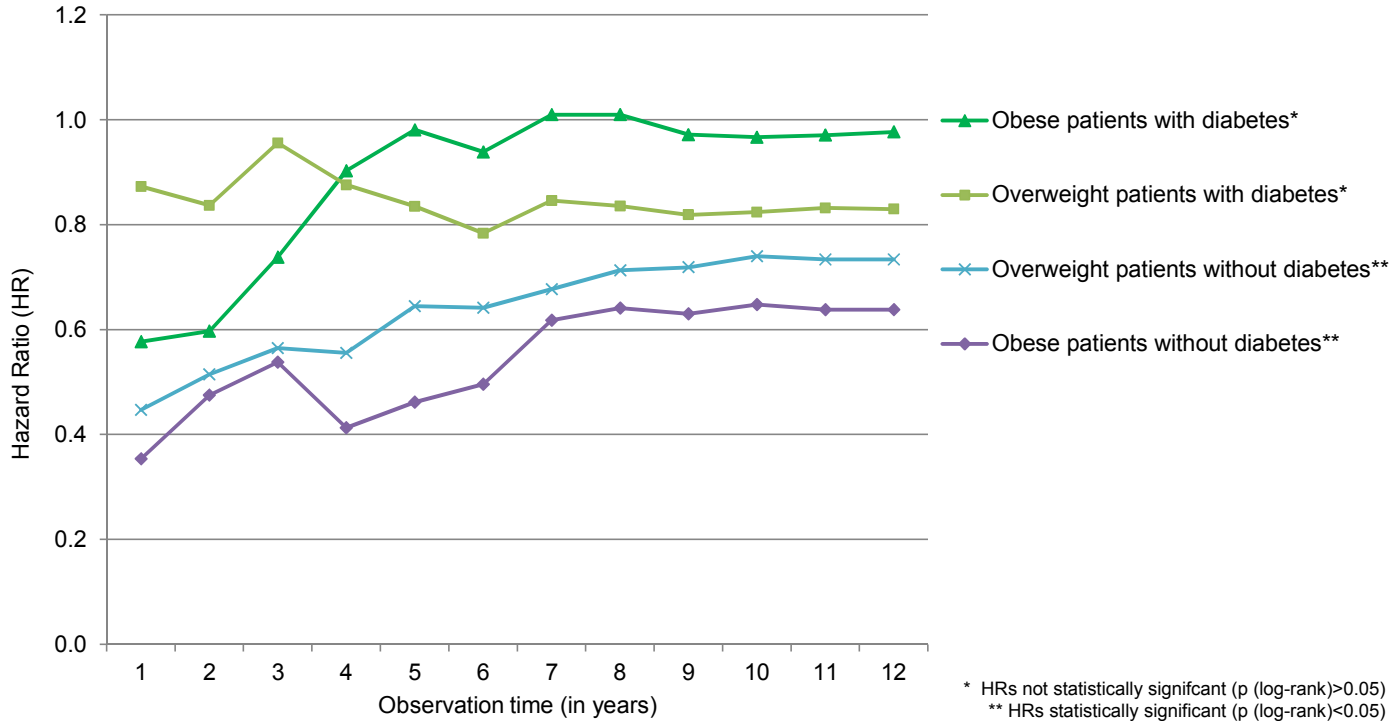

Supplement: 12933_2015_189_MOESM2_ESM.pdf [file 12933_2015_189_MOESM2_ESM.pdf]
